# Supplementary material for: Autoantibodies Against Lysosome Associated Membrane Protein-2 (LAMP-2) in Pediatric Chronic Primary Systemic Vasculitis
Source: PubMed Central journal article supplement (PMC7893977; doi:10.3389/fimmu.2020.624758), 2021-02-03
Supplement: DataSheet_1.pdf [file DataSheet_1.pdf]

## Supplementary Material

### 1 Supplementary Figures

**A**

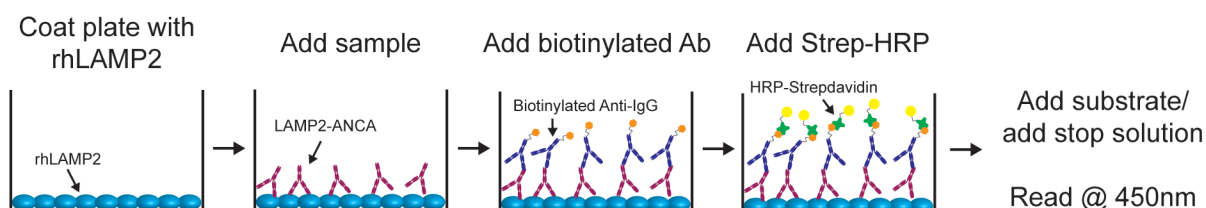

**B**

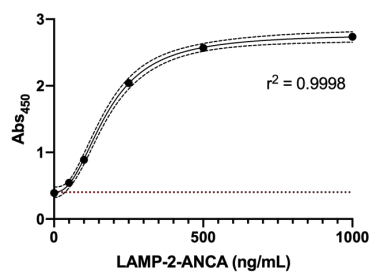

**C**

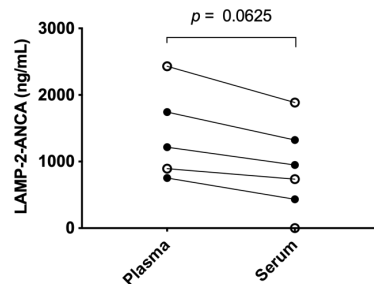

**D**

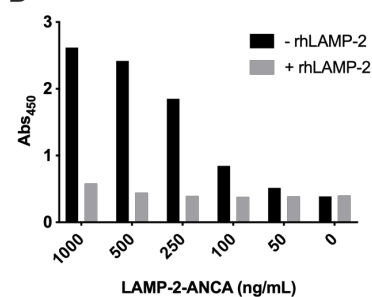

**Supplementary Figure S1. Custom indirect ELISA for detection of LAMP-2-ANCA in biosamples (serum or plasma).** (A) Schematic and (B) representative standard curve with serial dilutions of mouse anti-human LAMP-2 mAb (x-axis: 0, 50, 100, 250, 500, 1000 ng/mL) plotted against Absorbance at 450 nm (Abs<sub>450</sub>; y-axis). Data points were fit to a sigmoidal, 4-parametric curve ( $r^2 = 0.9998$ ). Dotted red line denotes lower-limit of detection (Abs<sub>450</sub> = 0.402). (C) Concentration of LAMP-2-ANCA (y-axis; ng/mL) in paired plasma and serum (x-axis) from pediatric patients with vasculitis ( $n = 3$ ; closed circles) and inflammation due to an autoinflammatory disease ( $n = 2$ ; open circles). Paired plasma and sera from pediatric patients show slightly elevated LAMP-2-ANCA concentration in plasma ( $n = 5$   $p = 0.0625$ ) (D) To validate the assay, standards (50 - 1000 ng/mL anti-human LAMP-2 mAb; x-axis) were added to the plate with (grey bars) and without (black bars) 25  $\mu$ g rhLAMP-2. Absorbance (Abs<sub>450</sub>; y-axis) of paired standards was measured. The rhLAMP-2 protein effectively blocks >97% of binding of 500 ng/mL mAb or less.
